# Supplementary material
Source: ML conference proceedings conference paper supplement (https://openreview.net/forum?id=wISvONp3Kq)
Supplement: supplementary_material [file attachment]

# CODE README OF SUBMISSION #448

## Anonymous authors

Paper under double-blind review

This file delineates the contents of the `Implementation` folder found in the supplementary material of submission #448.

## 1 ARCHIVE CONTENTS

The `datasets` directory houses the specific data structures and the raw caches of the datasets used in the experiments. The file `adjunct_func.py` implements some auxiliary functions, while `algorithms.py` provides the implementation for the proposed algorithm. The script `data_rounds.py` is employed for the organization of data in each online round during the experimentation phase. Refer to `environment.txt` for details on environmental prerequisites, specifically noting that the `Scipy` version required must be 1.4.4 or higher.

## 2 NOTATIONS

To facilitate understanding, Table 1 elucidates the primary identifiers in the implementation, correlating them with the mathematical symbols used in the main paper.

Table 1: Correspondence between identifiers and their respective symbols.

| Identifier                    | Notation                                                                                   |
|-------------------------------|--------------------------------------------------------------------------------------------|
| <code>[X_init, y_init]</code> | $X^\circ$                                                                                  |
| <code>[X_del, y_del]</code>   | $X^-$                                                                                      |
| <code>[X_add, y_add]</code>   | $X^+$                                                                                      |
| <code>[X_val, y_val]</code>   | $\{\tilde{\mathbf{x}}_i, \tilde{y}_i\}_{i=1}^N$                                            |
| <code>lam1</code>             | $\lambda_1$                                                                                |
| <code>lam2</code>             | $\lambda_2$                                                                                |
| <code>b0</code>               | $\hat{\beta}^{(i)}$                                                                        |
| <code>active</code>           | $\mathcal{A}$                                                                              |
| <code>inactive</code>         | $\mathcal{S}_{\mathcal{Z}}$                                                                |
| <code>bt_A</code>             | $\hat{\beta}_{\mathcal{A}}$                                                                |
| <code>X_init_A</code>         | $\{\mathbf{x}_{i,\mathcal{A}} \mid \forall i \in [1, n_0]\}$                               |
| <code>X_del_A</code>          | $\{\mathbf{x}_{i,\mathcal{A}} \mid \forall i \in [n_0+1, n_0+n_-]\}$                       |
| <code>X_add_A</code>          | $\{\mathbf{x}_{i,\mathcal{A}} \mid \forall i \in [n_0+n_-+1, n_0+n_-+n_+]\}$               |
| <code>bt_inA</code>           | $\hat{\beta}_{\mathcal{S}_{\mathcal{Z}}}$                                                  |
| <code>omegas</code>           | $\omega_i \ (i \in \mathcal{S}_{\mathcal{Z}})$                                             |
| <code>mu</code>               | $\mu(\cdot)$                                                                               |
| <code>nu</code>               | $\nu(\cdot)$                                                                               |
| <code>key_mat</code>          | $\mathcal{L}$                                                                              |
| <code>X_init_inA</code>       | $\{\mathbf{x}_{i,\mathcal{S}_{\mathcal{Z}}} \mid \forall i \in [1, n_0]\}$                 |
| <code>X_del_inA</code>        | $\{\mathbf{x}_{i,\mathcal{S}_{\mathcal{Z}}} \mid \forall i \in [n_0+1, n_0+n_-]\}$         |
| <code>X_add_inA</code>        | $\{\mathbf{x}_{i,\mathcal{S}_{\mathcal{Z}}} \mid \forall i \in [n_0+n_-+1, n_0+n_-+n_+]\}$ |

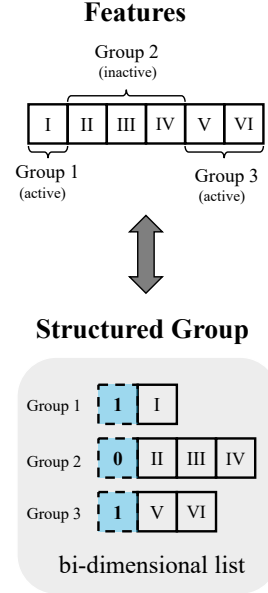

Figure 1: Structured data design for group-wise penalization, preserving both shrinkage and grouping information.

## 3 REMARKS ON GROUP-WISE REGULARIZER

For efficient organization, we employ a specialized data structure to manage the active group, exemplified in Figure 1, which diverges from the original definition of  $\mathcal{A}$ . The partition here is stored as a bi-dimensional Python list, with each sublist's first value serving as a flag bit. This list should be manually configured prior to its integration into the `SAGO` framework.
